# Supplementary material for: Efficient adsorption and separation of dysprosium from NdFeB magnets in an acidic system by ion imprinted mesoporous silica sealed in a dialysis bag
Source: Royal Society of Chemistry journal article supplement (doi:10.1039/c6gc01426g), 2016-01-01
Supplement: c6gc01426g1.pdf [file c6gc01426g1.pdf]

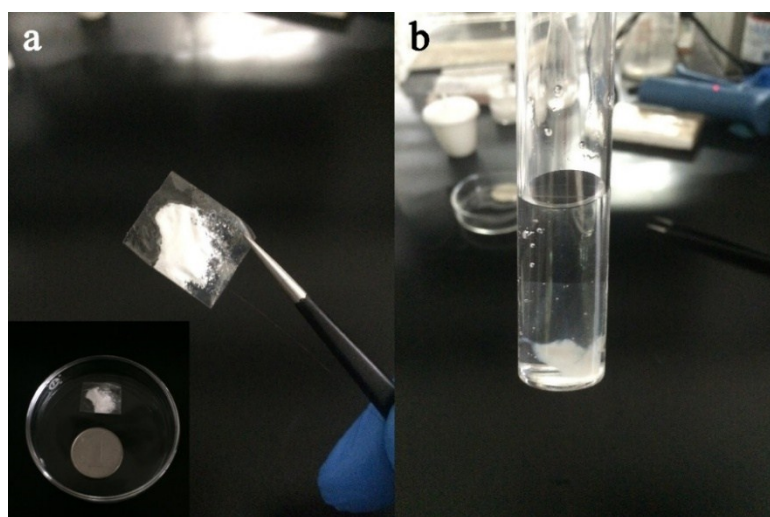

Fig. S1. Photograph showing the IMS set up with the dialysis bags (a: IMS were encapsulated in the dialysis, the coin of the inset is included for scale, diameter=25 mm. b: loaded dialysis bags in solution.)

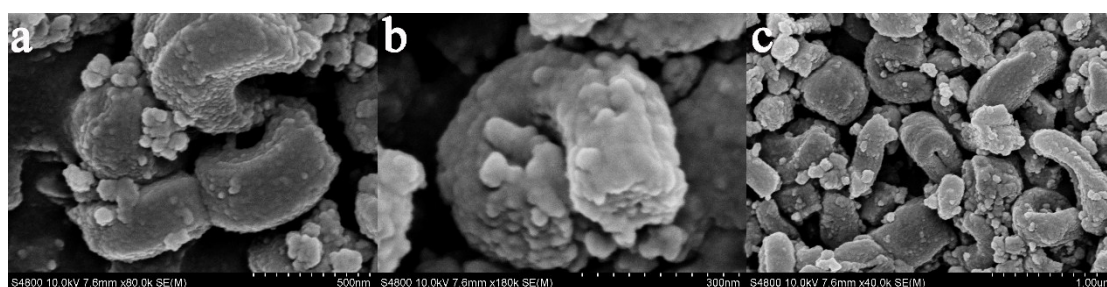

Fig. S2. SEM images of SBA-15 (a), IMS (b), and NIMS (c).

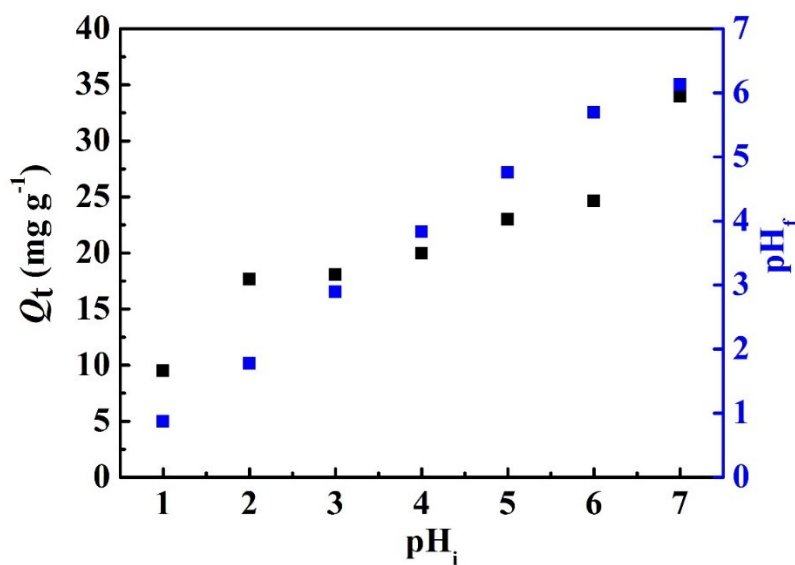

Fig. S3. pH effect on Dy(III) adsorption capacities using IMS (including pH variation: pH<sub>f</sub> vs. pH<sub>i</sub>).

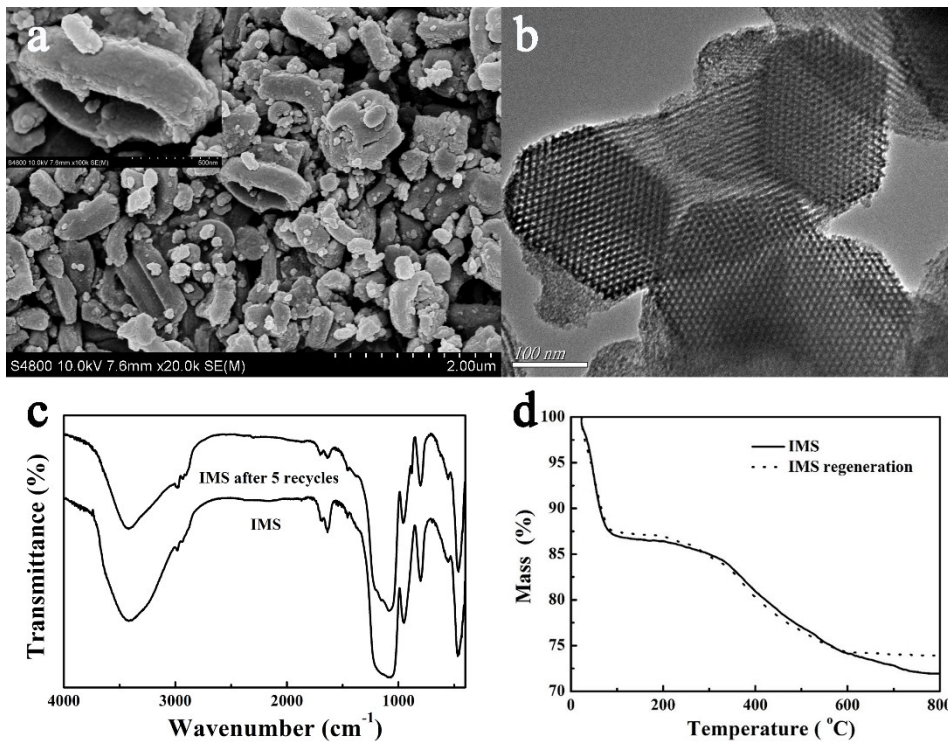

Fig. S4. SEM (a, in different magnification), TEM (b), FT-IR analysis (c), and TGA analysis (d) for IMS before and after the regeneration tests.

Table S1: Elemental composition of the materials from elemental analysis

| Materials | N (%) | C (%) | H(%) |
|-----------|-------|-------|------|
| SBA-15    | -     | -     | 1.66 |
| IMS       | -     | 6.52  | 2.50 |
| NIMS      | -     | 5.53  | 2.40 |
